# Supplementary material for: Lack of Association between Serum Interleukin-23 and Interleukin-27 Levels and Disease Activity in Patients with Active Systemic Lupus Erythematosus
Source: MDPI journal article supplement (doi:10.3390/jcm10204788), 2021-10-19
Supplement: s1 [file s1]

# Association between serum interleukin-23 and interleukin-27 levels and disease activity in Polish patients with active systemic lupus erythematosus

Katarzyna Pawlak-Buś, Wiktor Schmidt, Piotr Leszczyński

## Supplementary material

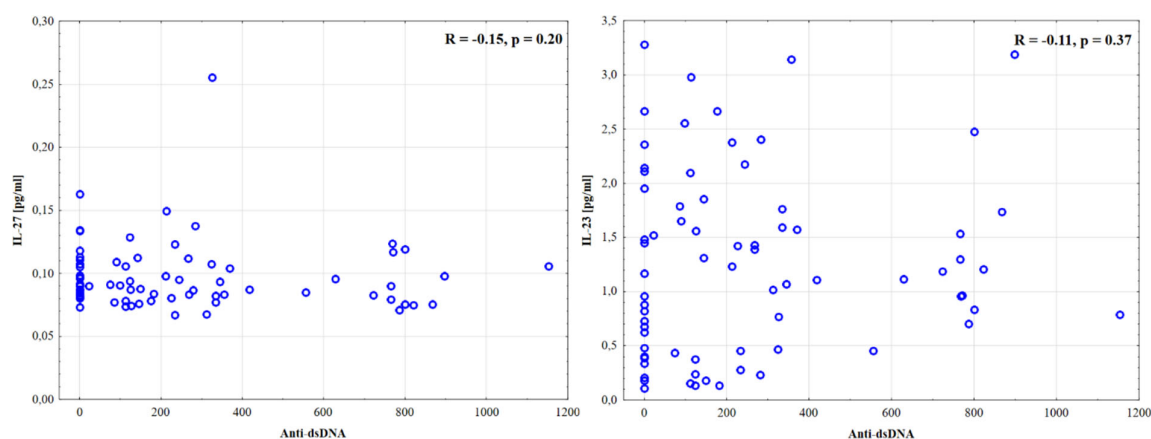

**Figure S1.** Association between serum IL-27 and IL-23 levels and anti-dsDNA.

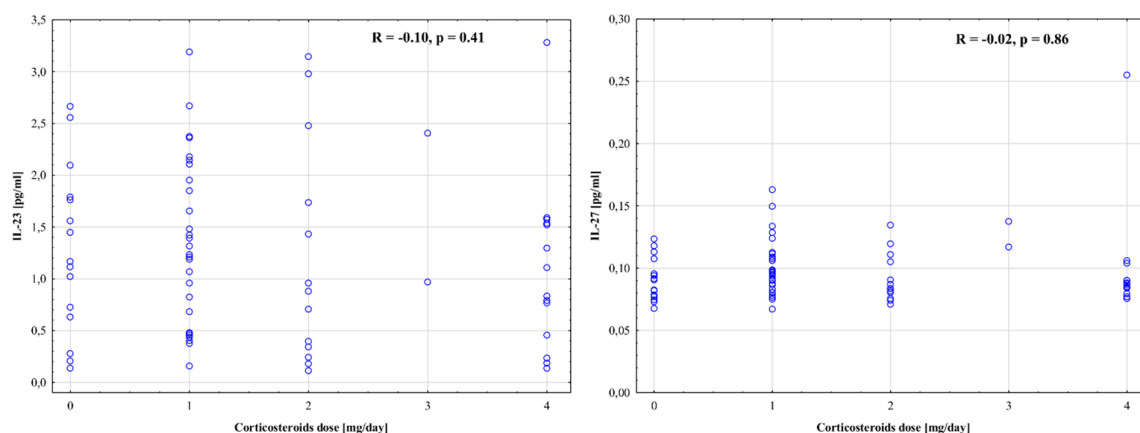

**Figure S2.** Association between corticosteroids dose and IL-23 and IL-27 levels. Corticosteroid doses expressed as prednisolone equivalency were classified as follows: 1:  $\leq 7.5$  mg; 2: 7.6–10 mg; 3:  $> 10$  mg; 4: high intravenous corticosteroids doses.

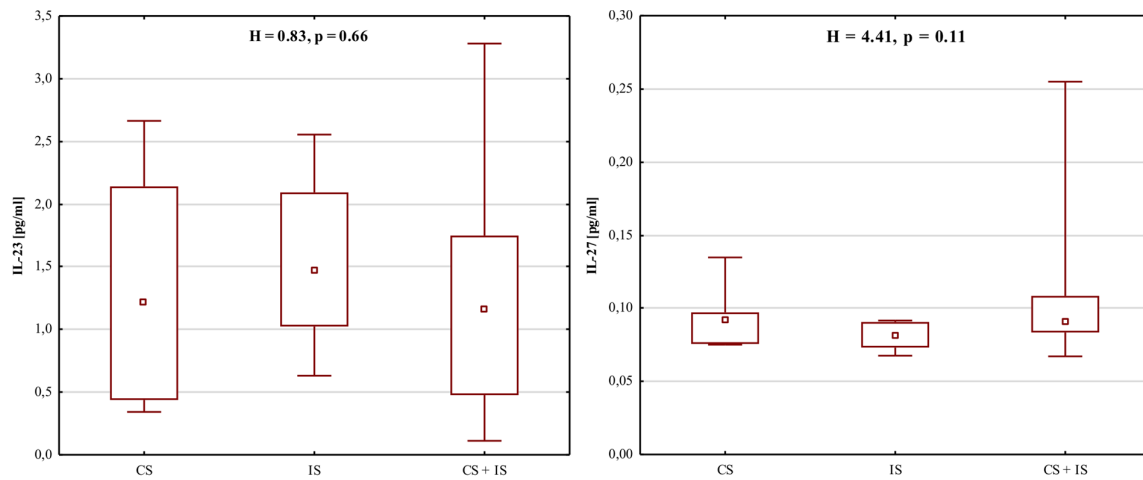

**Figure S3.** Association between IL-23 and IL-27 levels and type of treatment. CS, corticosteroids; IS, immunosuppressant medications; whiskers – min-max, inside box corresponds to the median, outside box boundaries correspond to 25% and 75%.
